# Supplementary material for: Epigenetic Silencing of OR and TAS2R Genes Expression in Human Orbitofrontal Cortex At Early Stages of Sporadic Alzheimer’s Disease
Source: Research Square preprint supplement (doi:10.21203/rs.3.rs-1098461/v1), 2021-12-03
Supplement: Supplementary file 1 [file d3f5758c4e2eebb129cd3454.pdf]

## Contents

---

**Supplementary Table 1 - Detailed demographic and basic pathological information on orbitofrontal cortex specimens.**

PMI, *post-mortem* interval; NFT, neurofibrillary tangle; nd, no data available, M, male; F, female.

**Supplementary Table 2 – List of primer sequences used for real time qPCR and H3K9me3 CHIP-qPCR analyses.** Fw,

forward primer; Rv, reverse primer; TSS, transcription start site.

**Supplementary Table 3 and 4 – GO enrichment on biological process for the proteins identified in OFC common to**

**Braak I and V (Supplementary Table 3) and unique to Braak V (Supplementary Table 4).** GO enrichment analysis was performed with Panther software<sup>32</sup>. *Homo sapiens* (all genes in database) was used as reference list for the enrichment analysis. Fold Enrichment of the genes observed in the uploaded list over the expected are shown. Raw p-values were determined by Fisher's exact test and False Discovery Rate (FDR) was calculated by the Benjamini-Hochberg procedure. In the tables, only terms with FDR < 0.05 are displayed.

**Supplementary Table 1 - Detailed demographic and basic pathological information on orbitofrontal cortex specimens.**

| Case | Sex | Age at death (years) | PMI (hours) | Braak NFT Stage | APOE |
|------|-----|----------------------|-------------|-----------------|------|
| 1    | M   | 64                   | 3,5         | 0               | 33   |
| 2    | M   | 63                   | 2,8         | 0               | 33   |
| 3    | M   | 72                   | nd          | 0               | 23   |
| 4    | M   | 68                   | 23          | 0               | 33   |
| 5    | M   | 61                   | 22,5        | 0               | 33   |
| 6    | M   | 62                   | 5           | 0               | 34   |
| 7    | M   | 100                  | 1,3         | 0               | 33   |
| 8    | M   | 58                   | 7           | 0               | 33   |
| 9    | M   | 79                   | 15,8        | 0               | 33   |
| 10   | M   | 80                   | 24          | 0               | 33   |
| 11   | M   | 51                   | nd          | 0               | nd   |
| 12   | M   | 47                   | 4,9         | 0               | nd   |
| 13   | M   | 46                   | 15          | 0               | nd   |
| 14   | F   | 52                   | 5,8         | 0               | nd   |
| 15   | F   | 81                   | 4           | 0               | 33   |
| 16   | F   | 64                   | 5           | 0               | 23   |
| 17   | F   | 75                   | 6,2         | 0               | 33   |
| 18   | F   | 55                   | 8,5         | 0               | 33   |
| 19   | F   | 86                   | 7           | 0               | nd   |
| 20   | F   | 97                   | 16,3        | 0               | 34   |
| 21   | F   | 49                   | 24          | 0               | 33   |
| 22   | F   | 99                   | 3           | 0               | 33   |
| 23   | F   | 88                   | 16,3        | 0               | 33   |
| 24   | F   | 67                   | 24          | 0               | 33   |
| 25   | F   | 71                   | 4           | 0               | 33   |
| 26   | M   | 65                   | 5,3         | I               | 34   |
| 27   | M   | 63                   | 8,1         | I               | 34   |
| 28   | M   | 58                   | 8,1         | I               | 33   |
| 29   | M   | 76                   | 6,5         | I               | 23   |
| 30   | M   | 68                   | 10,9        | I               | 23   |
| 31   | M   | 61                   | 4,5         | I               | 33   |
| 32   | M   | 59                   | 4,3         | I               | 33   |
| 33   | M   | 70                   | 2,8         | I               | 33   |
| 34   | M   | 59                   | 4,3         | I               | 33   |
| 35   | F   | 57                   | 5           | I               | 33   |
| 36   | F   | 59                   | 11,3        | I               | 34   |
| 37   | F   | 79                   | 3,6         | I               | 33   |
| 38   | F   | 67                   | 5,3         | I               | 34   |
| 39   | F   | 79                   | 6,4         | I               | 33   |
| 40   | F   | 73                   | 15,8        | I               | 22   |
| 41   | M   | 50                   | 4,3         | II              | 33   |
| 42   | M   | 66                   | 4,9         | II              | 33   |
| 43   | M   | 71                   | 5,3         | II              | 33   |
| 44   | M   | 66                   | 5,8         | II              | 23   |
| 45   | M   | 85                   | 3,8         | II              | 33   |
| 46   | M   | 80                   | 3,5         | II              | 33   |
| 47   | M   | 73                   | 9,6         | II              | 33   |
| 48   | M   | 78                   | nd          | II              | 23   |
| 49   | F   | 59                   | 4,3         | II              | 33   |
| 50   | F   | 65                   | nd          | II              | 33   |
| 51   | F   | 72                   | 8,5         | II              | 33   |
| 52   | M   | 66                   | 5,8         | III             | 33   |
| 53   | M   | 85                   | 4,8         | III             | 33   |
| 54   | M   | 64                   | 6           | III             | 33   |
| 55   | M   | 75                   | 3,4         | III             | 34   |
| 56   | M   | 76                   | 6           | III             | 34   |
| 57   | F   | 85                   | 14,3        | III             | 34   |
| 58   | F   | 74                   | 5,2         | III             | 33   |
| 59   | F   | 78                   | 6           | III             | 33   |
| 60   | F   | 90                   | 4           | III             | 33   |
| 61   | F   | 82                   | 3,1         | III             | 33   |
| 62   | M   | 84                   | 5           | IV              | 33   |
| 63   | M   | 74                   | 4,8         | IV              | 33   |
| 64   | F   | 90                   | 9,9         | IV              | 33   |
| 65   | F   | 88                   | 4,1         | IV              | 33   |
| 66   | M   | 79                   | 7,5         | V               | 33   |
| 67   | M   | 73                   | 4,5         | V               | 34   |
| 68   | M   | 93                   | 3           | V               | 33   |
| 69   | M   | 75                   | 11,5        | V               | 34   |
| 70   | M   | 82                   | 3,8         | V               | 34   |
| 71   | M   | 77                   | 16          | V               | 33   |
| 72   | F   | 74                   | 4,3         | V               | 34   |
| 73   | F   | 74                   | 5,5         | V               | 33   |
| 74   | F   | 81                   | 5,3         | V               | 23   |

PMI, *post-mortem* interval; NFT, neurofibrillary tangle; nd, no data available, M, male; F, female.

**Supplementary Table 2 – List of primer sequences used for real time qPCR and H3K9me3 ChIP-qPCR analyses.**

| Gene                           | Primer sequences (5' to 3')                             | Region of amplification (relative to TSS (+1)) | Analysis           |
|--------------------------------|---------------------------------------------------------|------------------------------------------------|--------------------|
| <i>Taste receptors, type 1</i> |                                                         |                                                |                    |
| <i>TAS1R1</i>                  | Fw ATTTAAGCAACTGGCCTCCTTAGA<br>Rv CCAGAATGGAGAGGGAACAGG | Exon 1                                         |                    |
| <i>TAS1R2</i>                  | Fw CCTGGCACACCATCAACAAC<br>Rv AGGACCACTCGTTATTCGGG      | Exons 4-6                                      | RT-qPCR            |
| <i>TAS1R3</i>                  | Fw GCAGGGCTAAATCACCACCA<br>Rv CTGAGGCGTTGCACTGAAGA      | Exon 3                                         |                    |
| <i>Taste receptors, type 2</i> |                                                         |                                                |                    |
| <i>TAS2R14</i>                 | Fw GGTGCTGCTTCTTGACTT<br>Rv TGCATCTTCTGCGATGTTCC        | Exon 1 (+393 to +638)                          | RT-qPCR, ChIP-qPCR |
|                                | Fw TGTTTCCTTTCTCACCAGCTAC<br>Rv AAATCTCTGTATTTCCCGAGACA | Proximal (-285 to -181)                        | ChIP-qPCR          |
| <i>TAS2R5</i>                  | Fw CGGCTACTTGTGGCTGAA<br>Rv TACCGAATGCTGCTGTTCCCT       | Exon 1 (+338 to +479)                          | RT-qPCR, ChIP-qPCR |
|                                | Fw CCGGTGTCTGTGGTACTGTTT<br>Rv CTCGTCCTCCGTAATCTGTCT    | Proximal (-253 to -102)                        | ChIP-qPCR          |
| <i>Olfactory receptors</i>     |                                                         |                                                |                    |
| <i>OR13A1</i>                  | Fw TGCTGAAGAAATGACTGGCTG<br>Rv TGAGATCAAAGAATCGGGGCT    | Exons 2-3                                      | RT-qPCR            |
| <i>OR1L8</i>                   | Fw CCATTCGCTTCAACCCCA<br>Rv CACCCAGCATAGGAGATGGTC       | Exon 5 (+146 to +293)                          | RT-qPCR, ChIP-qPCR |
|                                | Fw AAAACTCTCCCTCTGTCCCTCC<br>Rv TTGTGGGATGGCTTGTTCACC   | Proximal (-236 to -125)                        | ChIP-qPCR          |
| <i>OR2H2</i>                   | Fw GGGCAAGTCTTTGGTCTCTTC<br>Rv TTTGTGTGAGCCCATTTCTT     | Exon 2 (+804 to +934)                          | RT-qPCR, ChIP-qPCR |
|                                | Fw TGTGAGTATCCATCTGCTGTCC<br>Rv TCCCTGTTCTTCTGGTCAA     | Proximal (-258 to -178)                        | ChIP-qPCR          |
| <i>OR2K2</i>                   | Fw TGCCCATTTGACTGTGGTGA<br>Rv AGCACTCCGTAAAGCAACGA      | Exon 2 (+810 to +926)                          | RT-qPCR, ChIP-qPCR |
|                                | Fw TCATATTTTCTCATTGCTCACT<br>Rv TCCTAACCTATCCTTGGCACAC  | Proximal (-268 to -195)                        | ChIP-qPCR          |
| <i>OR7A17</i>                  | Fw CAGCTTACTCCTGGCTGTGA<br>Rv TTCAGGGCAGCAATCATCCA      | Exon 3                                         | RT-qPCR            |
| <i>Housekeeping genes</i>      |                                                         |                                                |                    |
| <i>GAPDH</i>                   | Fw TCACCAGGGCTGCTTTAACT<br>Rv AGCATCGCCCCACTTGATTT      | Exons 3-5                                      |                    |
| <i>ACTB</i>                    | Fw CGCCGCCAGCTCACC<br>Rv GCTCGATGGGGTACTTCAGG           | Exons 1-3                                      | RT-qPCR            |
| <i>PGK1</i>                    | Fw GAATCACCGACCTCTCTCC<br>Rv AAGGACTACCGACTTGGCTC       | Exons 1-3                                      |                    |

Fw, forward primer; Rv, reverse primer; TSS, transcription start site.

**Supplementary Table 3 – GO enrichment on biological process for the proteins identified in OFC common to Braak I and V.**

| <b>GO number</b> | <b>GO term</b>                                                          | <b>Number of genes identified in OFC common to Braak I and V</b> | <b>Total number of genes in <i>Homo sapiens</i> reference list</b> | <b>Fold enrichment</b> | <b>raw P value</b> | <b>FDR</b> |
|------------------|-------------------------------------------------------------------------|------------------------------------------------------------------|--------------------------------------------------------------------|------------------------|--------------------|------------|
| GO:0006342       | chromatin silencing                                                     | 4                                                                | 51                                                                 | > 100                  | 3,19E-08           | 2,51E-04   |
| GO:0016458       | gene silencing                                                          | 4                                                                | 148                                                                | 42,82                  | 1,93E-06           | 2,17E-03   |
| GO:0045814       | negative regulation of gene expression, epigenetic                      | 4                                                                | 61                                                                 | > 100                  | 6,31E-08           | 2,48E-04   |
| GO:0040029       | regulation of gene expression, epigenetic                               | 5                                                                | 130                                                                | 60,93                  | 1,38E-08           | 2,17E-04   |
| GO:0097549       | chromatin organization involved in negative regulation of transcription | 4                                                                | 72                                                                 | 88,01                  | 1,19E-07           | 3,12E-04   |
| GO:0034401       | chromatin organization involved in regulation of transcription          | 4                                                                | 86                                                                 | 73,69                  | 2,36E-07           | 4,64E-04   |
| GO:0006325       | chromatin organization                                                  | 7                                                                | 686                                                                | 16,17                  | 6,79E-08           | 2,13E-04   |
| GO:0016043       | cellular component organization                                         | 12                                                               | 5298                                                               | 3,59                   | 8,41E-07           | 1,32E-03   |
| GO:0071840       | cellular component organization or biogenesis                           | 12                                                               | 5496                                                               | 3,46                   | 1,29E-06           | 1,84E-03   |
| GO:0051276       | chromosome organization                                                 | 8                                                                | 1021                                                               | 12,41                  | 3,87E-08           | 2,03E-04   |
| GO:0006996       | organelle organization                                                  | 11                                                               | 3360                                                               | 5,19                   | 1,25E-07           | 2,80E-04   |
| GO:0006334       | nucleosome assembly                                                     | 4                                                                | 101                                                                | 62,74                  | 4,39E-07           | 7,67E-04   |
| GO:0065004       | protein-DNA complex assembly                                            | 4                                                                | 167                                                                | 37,95                  | 3,09E-06           | 3,03E-03   |
| GO:0071824       | protein-DNA complex subunit organization                                | 4                                                                | 208                                                                | 30,47                  | 7,24E-06           | 6,32E-03   |
| GO:0031497       | chromatin assembly                                                      | 4                                                                | 134                                                                | 47,29                  | 1,31E-06           | 1,72E-03   |
| GO:0006323       | DNA packaging                                                           | 4                                                                | 180                                                                | 35,21                  | 4,13E-06           | 3,82E-03   |
| GO:0071103       | DNA conformation change                                                 | 4                                                                | 269                                                                | 23,56                  | 1,96E-05           | 1,47E-02   |
| GO:0006333       | chromatin assembly or disassembly                                       | 4                                                                | 154                                                                | 41,15                  | 2,25E-06           | 2,36E-03   |
| GO:0034728       | nucleosome organization                                                 | 4                                                                | 140                                                                | 45,26                  | 1,56E-06           | 1,88E-03   |
| GO:0006338       | chromatin remodeling                                                    | 4                                                                | 247                                                                | 25,66                  | 1,41E-05           | 1,17E-02   |
| GO:0032200       | telomere organization                                                   | 3                                                                | 82                                                                 | 57,96                  | 1,88E-05           | 1,48E-02   |

GO enrichment analysis was performed with Panther software 32. *Homo sapiens* (all genes in database) was used as reference list for the enrichment analysis. Fold Enrichment of the genes observed in the uploaded list over the expected are shown. Raw p-values were determined by Fisher's exact test and False Discovery Rate (FDR) was calculated by the Benjamini-Hochberg procedure. In the tables, only terms with FDR < 0.05 are displayed.

**Supplementary Table 4 – GO enrichment on biological process for the proteins identified in OFC unique to Braak V.**

| <b>GO number</b> | <b>GO term</b>                                                          | <b>Number of genes identified in OFC unique to Braak V</b> | <b>Total number of genes in <i>Homo sapiens</i> reference list</b> | <b>Fold enrichment</b> | <b>raw P value</b> | <b>FDR</b> |
|------------------|-------------------------------------------------------------------------|------------------------------------------------------------|--------------------------------------------------------------------|------------------------|--------------------|------------|
| GO:0006342       | chromatin silencing                                                     | 5                                                          | 51                                                                 | 91,78                  | 3,13E-09           | 2,46E-05   |
| GO:0016458       | gene silencing                                                          | 5                                                          | 148                                                                | 31,63                  | 5,01E-07           | 7,16E-04   |
| GO:0010629       | negative regulation of gene expression                                  | 9                                                          | 879                                                                | 9,59                   | 1,47E-07           | 2,89E-04   |
| GO:0045814       | negative regulation of gene expression, epigenetic                      | 5                                                          | 61                                                                 | 76,73                  | 7,27E-09           | 3,81E-05   |
| GO:0040029       | regulation of gene expression, epigenetic                               | 5                                                          | 130                                                                | 36,01                  | 2,69E-07           | 4,70E-04   |
| GO:0097549       | chromatin organization involved in negative regulation of transcription | 5                                                          | 72                                                                 | 65,01                  | 1,60E-08           | 6,27E-05   |
| GO:0034401       | chromatin organization involved in regulation of transcription          | 5                                                          | 86                                                                 | 54,43                  | 3,72E-08           | 1,17E-04   |
| GO:0006325       | chromatin organization                                                  | 6                                                          | 686                                                                | 8,19                   | 6,59E-05           | 4,31E-02   |
| GO:0051276       | chromosome organization                                                 | 7                                                          | 1021                                                               | 6,42                   | 6,62E-05           | 4,16E-02   |
| GO:0002181       | cytoplasmic translation                                                 | 7                                                          | 122                                                                | 53,71                  | 5,02E-11           | 7,90E-07   |
| GO:0006412       | translation                                                             | 7                                                          | 366                                                                | 17,90                  | 8,09E-08           | 2,12E-04   |
| GO:0043043       | peptide biosynthetic process                                            | 7                                                          | 388                                                                | 16,89                  | 1,20E-07           | 2,68E-04   |
| GO:0006518       | peptide metabolic process                                               | 7                                                          | 519                                                                | 12,63                  | 8,27E-07           | 1,00E-03   |
| GO:0006807       | nitrogen compound metabolic process                                     | 16                                                         | 6360                                                               | 2,36                   | 6,63E-05           | 4,01E-02   |
| GO:0043603       | cellular amide metabolic process                                        | 7                                                          | 780                                                                | 8,40                   | 1,19E-05           | 1,10E-02   |
| GO:0034641       | cellular nitrogen compound metabolic process                            | 14                                                         | 3193                                                               | 4,10                   | 4,36E-07           | 6,85E-04   |
| GO:0043604       | amide biosynthetic process                                              | 7                                                          | 500                                                                | 13,11                  | 6,46E-07           | 8,46E-04   |
| GO:1901566       | organonitrogen compound biosynthetic process                            | 8                                                          | 1250                                                               | 5,99                   | 2,78E-05           | 2,08E-02   |
| GO:0010467       | gene expression                                                         | 11                                                         | 1992                                                               | 5,17                   | 1,81E-06           | 1,90E-03   |
| GO:0034645       | cellular macromolecule biosynthetic process                             | 8                                                          | 1368                                                               | 5,47                   | 5,30E-05           | 3,78E-02   |
| GO:0009059       | macromolecule biosynthetic process                                      | 8                                                          | 1391                                                               | 5,38                   | 5,96E-05           | 4,07E-02   |
| GO:0042273       | ribosomal large subunit biogenesis                                      | 4                                                          | 72                                                                 | 52,01                  | 1,19E-06           | 1,33E-03   |
| GO:0048024       | regulation of mRNA splicing, via spliceosome                            | 4                                                          | 103                                                                | 36,35                  | 4,67E-06           | 4,58E-03   |
| GO:0050684       | regulation of mRNA processing                                           | 4                                                          | 139                                                                | 26,94                  | 1,47E-05           | 1,22E-02   |
| GO:1903311       | regulation of mRNA metabolic process                                    | 5                                                          | 291                                                                | 16,08                  | 1,27E-05           | 1,11E-02   |
| GO:0043484       | regulation of RNA splicing                                              | 4                                                          | 150                                                                | 24,96                  | 1,97E-05           | 1,55E-02   |

GO enrichment analysis was performed with Panther software 32. *Homo sapiens* (all genes in database) was used as reference list for the enrichment analysis. Fold Enrichment of the genes observed in the uploaded list over the expected are shown. Raw p-values were determined by Fisher's exact test and False Discovery Rate (FDR) was calculated by the Benjamini-Hochberg procedure. In the tables, only terms with FDR < 0.05 are displayed.
