# Supplementary material for: Epigenetic Silencing of OR and TAS2R Genes Expression in Human Orbitofrontal Cortex At Early Stages of Sporadic Alzheimer’s Disease
Source: Research Square preprint supplement (doi:10.21203/rs.3.rs-1098461/v1), 2021-12-03
Supplement: Supplementary file 2 [file f9cd10611742225133377b21.docx]

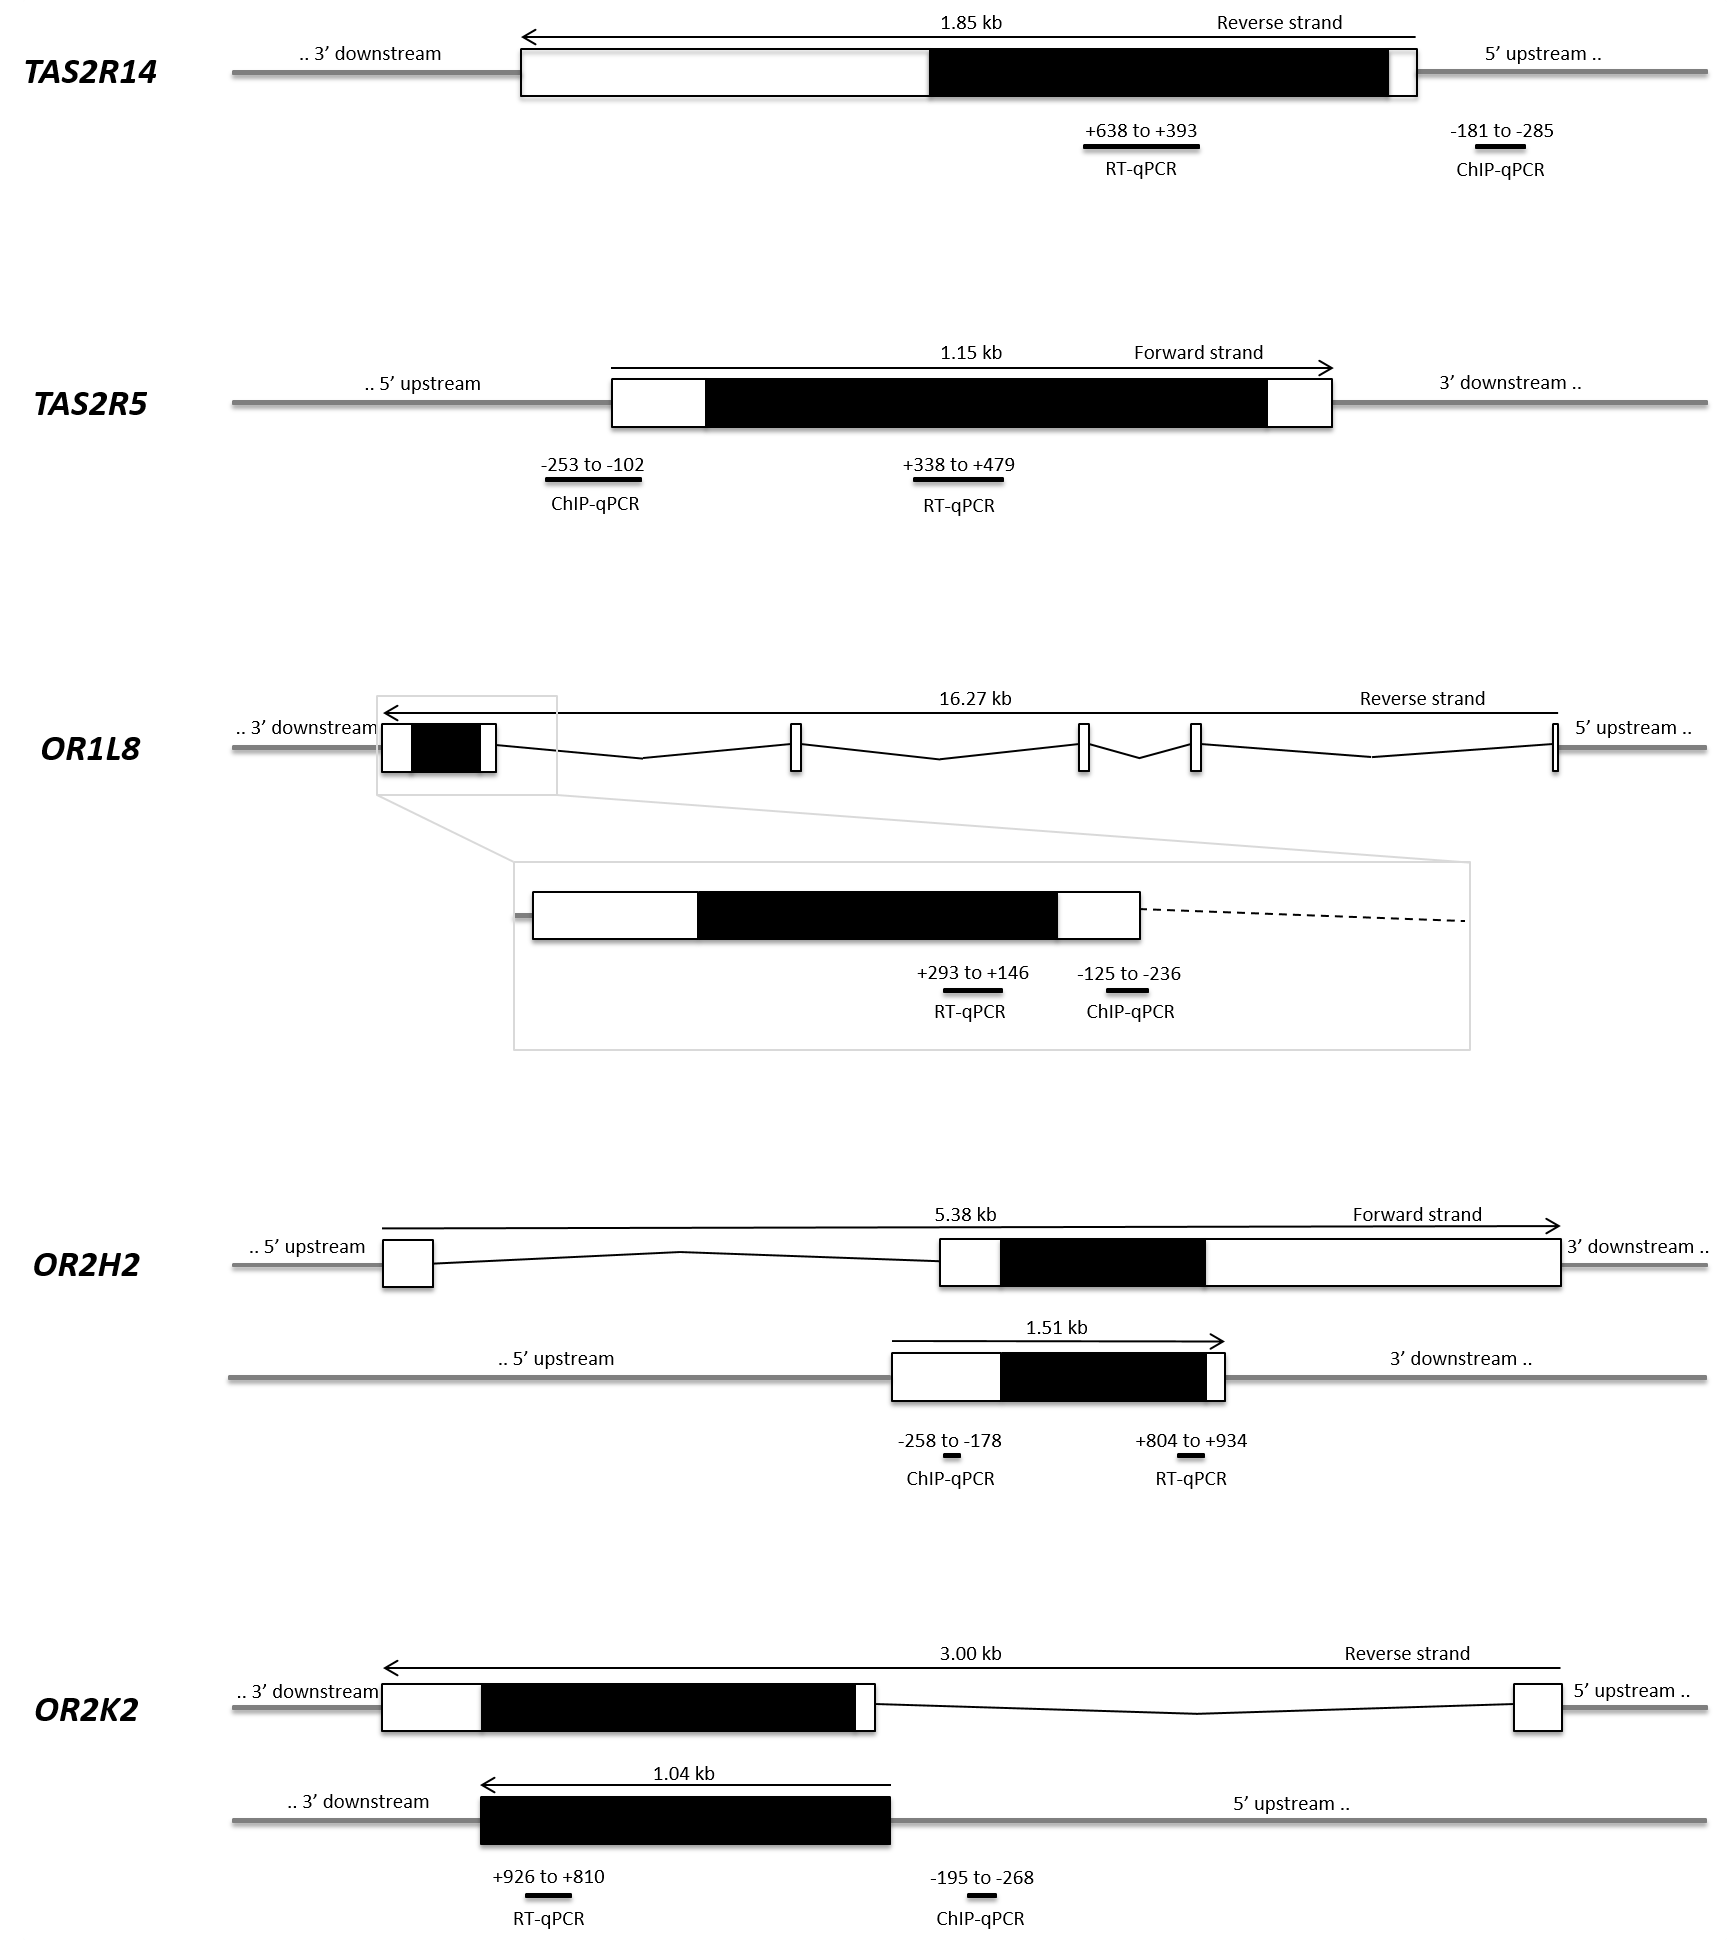


**Supplementary Figure 1 – Proximal promoter and coding regions targeted sequences coverage along the selected *OR* and *TAS2R* genes.** The corresponding gene name (symbol) is indicated on the left, white boxes indicate untranslated regions (UTR), and black boxes indicate translated regions. Direction (arrow) and length (kb) of each strand is indicated on top. Position of each amplicon (black bold line) relative to the transcription start site (TSS) is indicated at the bottom, as well as oligonucleotide pairs used (for detail on primers sequences see Supplementary Table 2).


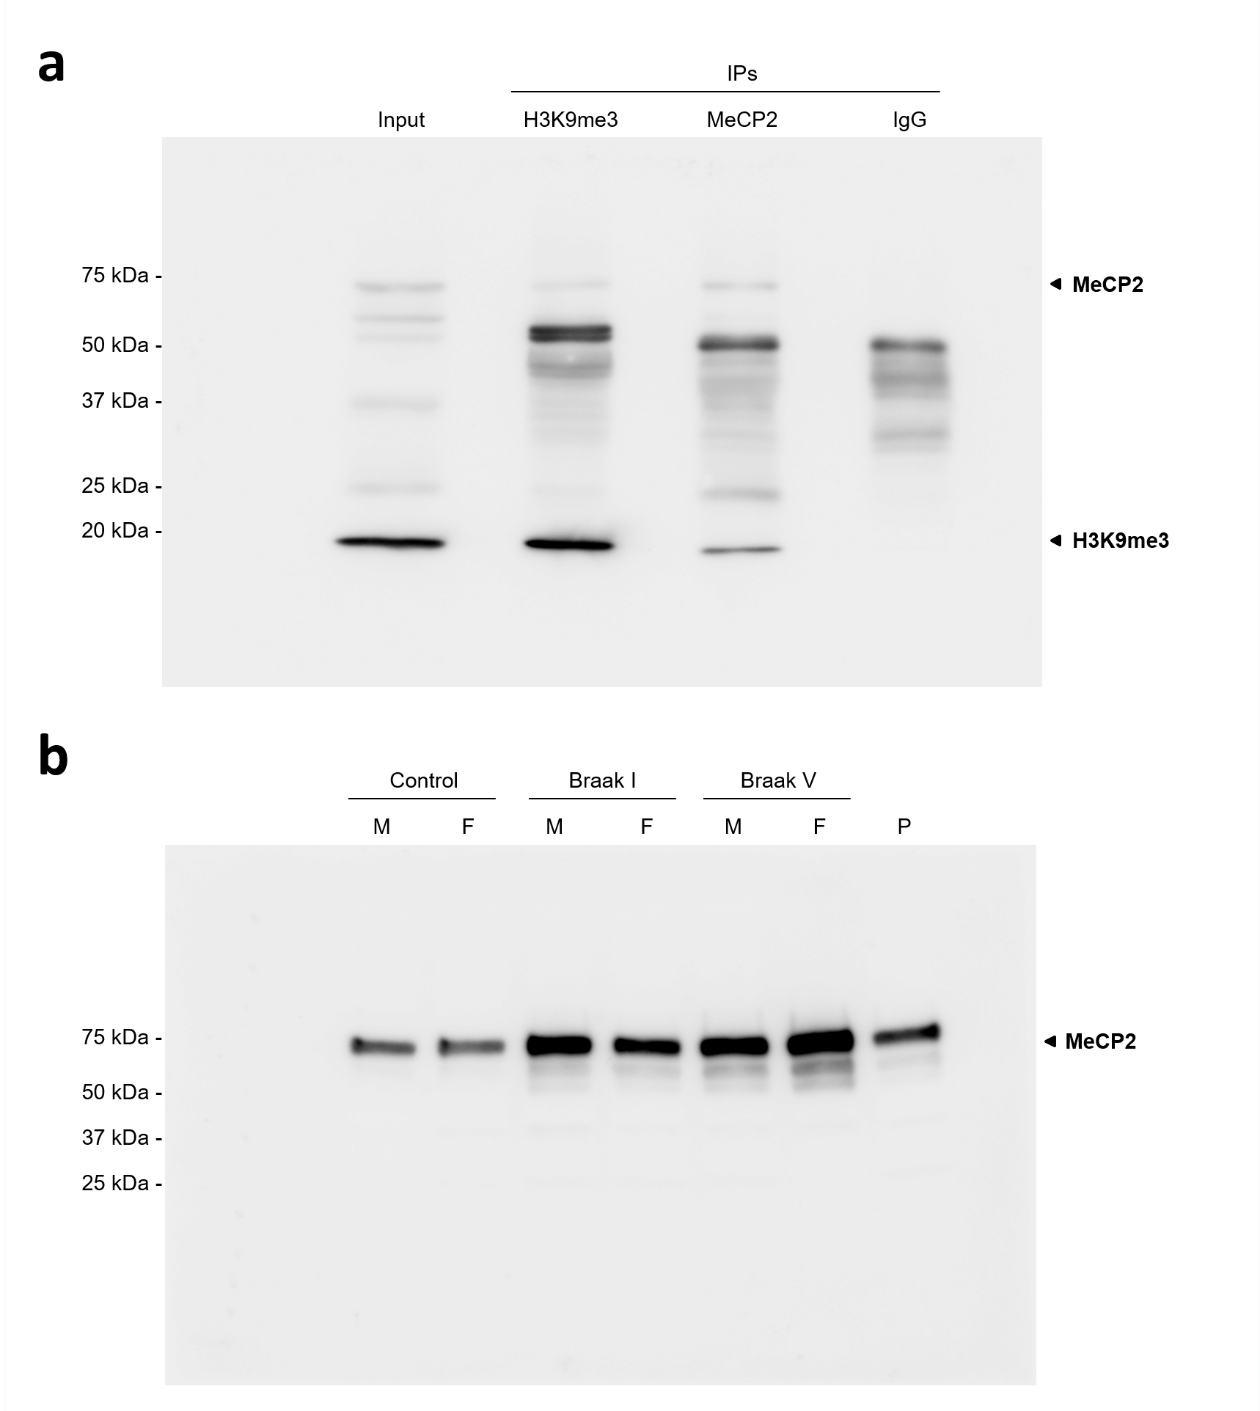


**Supplementary Figure 2 – Full-length Western blot images. a.** Full-length blot image for Figure 5d. **b.** Full-length blot image for Figure 5e.
